# Supplementary material for: Effectiveness and Cost-Effectiveness of Mental Health Interventions Delivered by Frontline Health Care Workers in Emergency Health Services: A Systematic Review and Meta-Analysis
Source: MDPI journal article supplement (doi:10.3390/ijerph192315847), 2022-11-28
Supplement: s1 [file s1]

Supplementary: Five categories of key words

| Category 1 | Category 2  | Category 3                 | Category 4        | Category 5 |
|------------|-------------|----------------------------|-------------------|------------|
| Surviv\$   | disaster    | PFA                        | health<br>outcome | evaluation |
| affected   | emergenc\$  | psychological first<br>aid |                   | trial      |
| victim     | catastrophe | mental                     |                   | controlled |
|            |             | psychology                 |                   | comparison |
|            |             |                            |                   | random\$   |
|            |             |                            |                   | training   |

Surviv\$ captures survive, survivor, and survivors; emergenc\$ captures emergency and emergencies; random\$ captures random, randomize, and randomization.
